# Supplementary material
Source: publisher figshare collection journal article supplement (https://acs.figshare.com/ndownloader/files/13628066)
Supplement: Supplementary file 1 [file 13628066]

## Sheet: S1
Supplementary Table S1. Primer sequences for pAQ1BB construction
Primer name	Primer sequence (5’-3’)	5’ site	3’ site
pAQ-BBPre-F	AATTCGCGGCCGCTTCTAGAGGC	EcoRI	NotI
pAQ-BBPre-R	GGCCGCCTCTAGAAGCGGCCGC
pAQ-BBSuf-F	TATGTACTAGTAGCGGCCGCTGCAGG	NdeI	BamHI
pAQ-BBSuf-R	GATCCCTGCAGCGGCCGCTACTAGTACA
pAQ-XSDM-F	GGTTTTTTGCTCGAGCCGAACGCAGCG	NA	NA
pAQ-XSDM-R	GCGTTCGGCTCGAGCAAAAAACCCGTC

## Sheet: S2
Supplementary Table S2. Primers to generate RBS+gene constructs (RBS in capital letters)
Construct	Primer name	Primer sequence (5’-3’)
RBS1-GFP	RBS1-GFP-F	gaattcgcggccgcttctagagTAAAATTACAAAACACTTTTTAGCTAGGACACATatgcgtaaaggagaagaacttttc
	Suffix-R	tactagtagcggccgctgcag
RBS2-GFP	RBS2-GFP-F	gaattcgcggccgcttctagagACACCTATAAGATCCTAGGGATAAAAAGATATCatgcgtaaaggagaagaacttttc
	Suffix-R	tactagtagcggccgctgcag
RBS3-GFP	RBS3-GFP-F	gaattcgcggccgcttctagagAGAATTACATATCGCACAAAGGTATATAAAAatgcgtaaaggagaagaactttt
	Suffix-R	tactagtagcggccgctgcag
RBS3-mpusfus	RBS3-Mpusfus-F	tctagagAGAATTACATATCGCACAAAGGTATATAAAAatgaatagtgccgtgaccatc
	Suffix-R	tactagtagcggccgctgcag
